# Supplementary material for: The Peculiarities of Large Intron Splicing in Animals
Source: PubMed Central journal article supplement (PMC2773006; doi:10.1371/journal.pone.0007853), 2009-11-16
Supplement: pone.0007853.s002.pdf [file pone.0007853.s002.pdf]

**Enrichment Ratios of RP-sites, 5' and 3' Splice Sites:  
Occurrence on Sense to Anti-sense Strand in Large Introns (>50kb)**

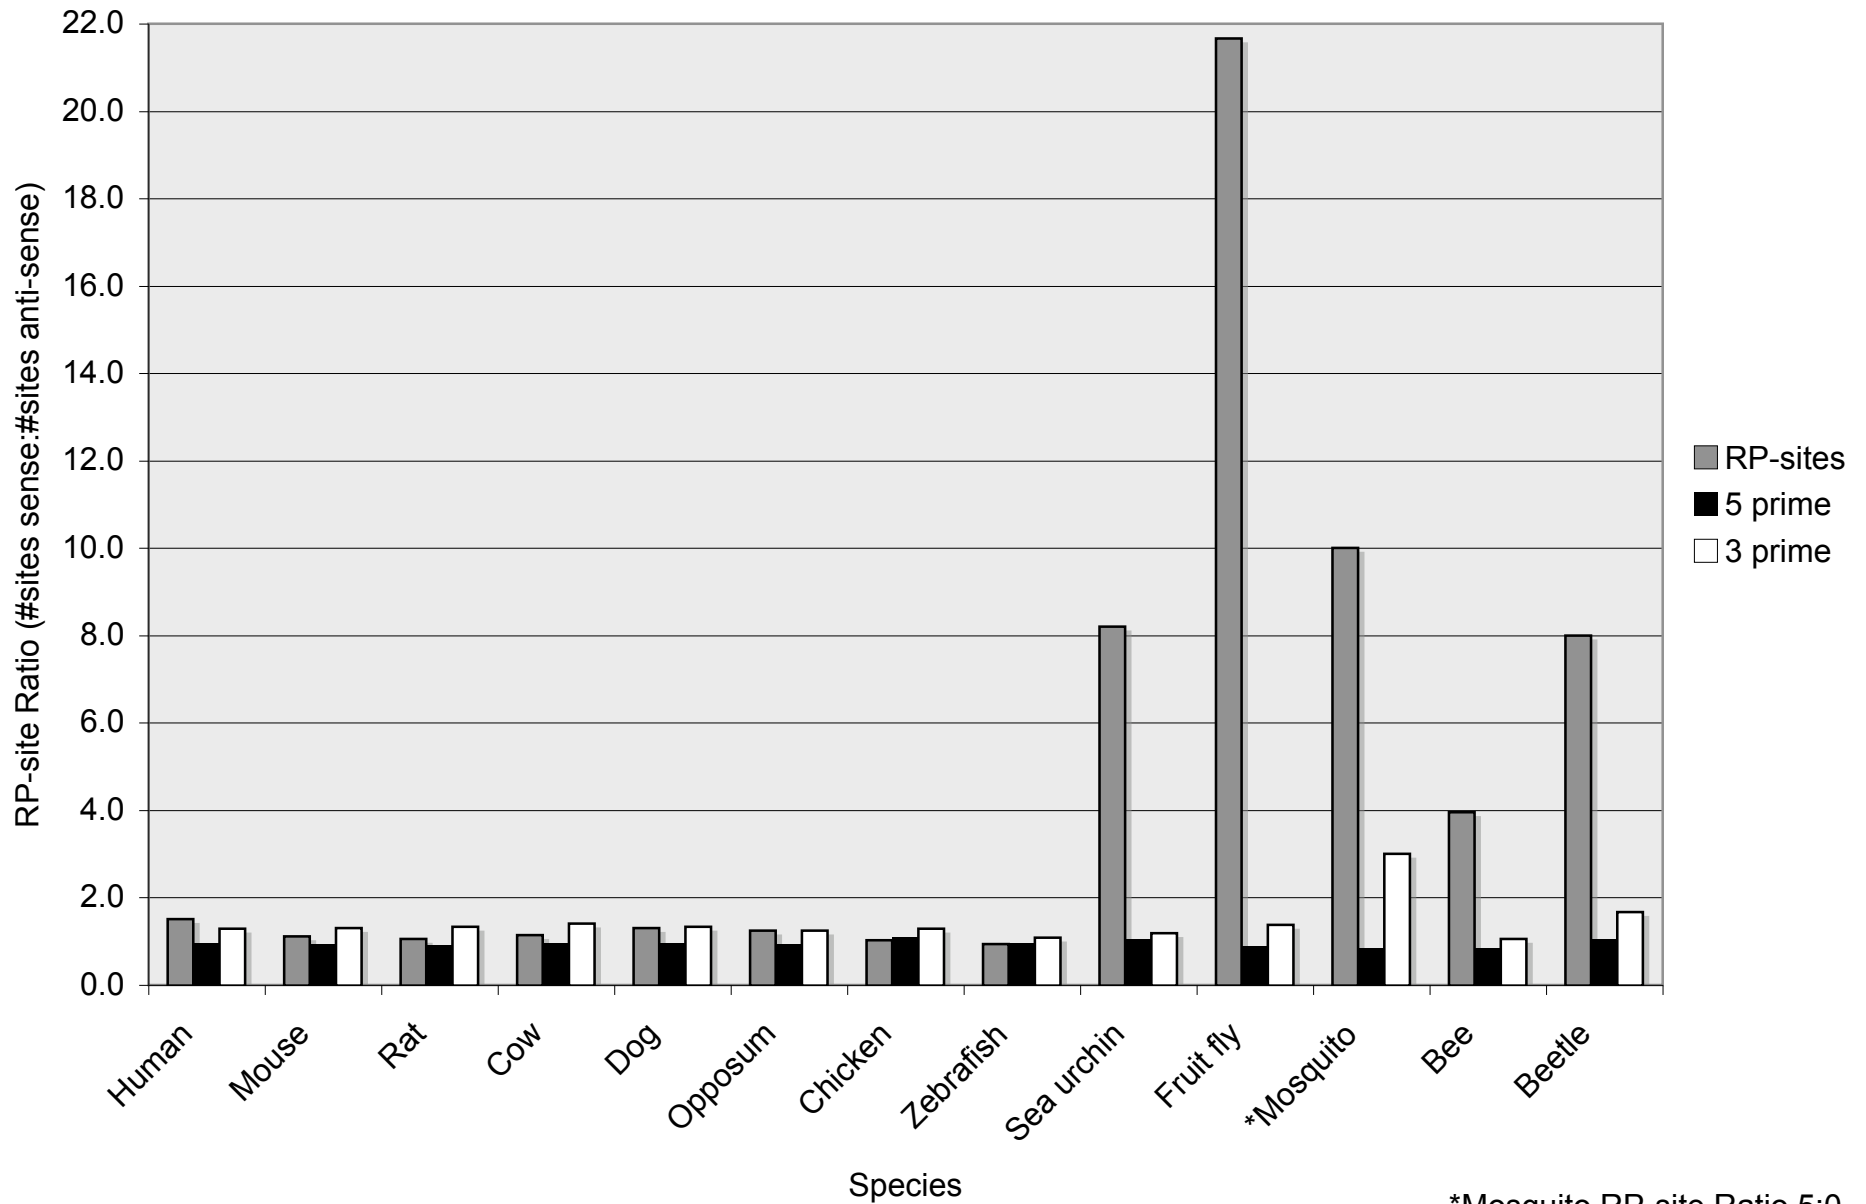

\*Mosquito RP-site Ratio 5:0
